# Supplementary material for: A Retrospective Study to Examine Healthcare Costs Related to Cardiovascular Events in Individuals with Hyperlipidemia
Source: PubMed Central journal article supplement — Adv Ther. 2015 Nov 19;32(11):1104–16. doi: 10.1007/s12325-015-0264-7 (PMC4662727; doi:10.1007/s12325-015-0264-7), 2015-11-19
Supplement: 12325_2015_264_MOESM1_ESM.pdf [file 12325_2015_264_MOESM1_ESM.pdf]

**SUPPLEMENTARY MATERIAL**

**Table S1. Lipid-lowering medications.**

| <b>Class</b>                                        | <b>Medications</b>               |
|-----------------------------------------------------|----------------------------------|
| Statins (HMG-CoA reductase inhibitors) <sup>1</sup> | atorvastatin                     |
|                                                     | fluvastatin                      |
|                                                     | lovastatin                       |
|                                                     | pitavastatin                     |
|                                                     | pravastatin                      |
|                                                     | rosuvastatin                     |
|                                                     | simvastatin                      |
| Colesevelam                                         | colesevelam                      |
| Non-colesevelam bile acid sequestrants              | cholestyramine                   |
|                                                     | colestipol                       |
| Cholesterol absorption inhibitors                   | ezetimibe                        |
| Fibrates <sup>2</sup>                               | fenofibrate                      |
|                                                     | fenofibric acid                  |
|                                                     | gemfibrozil                      |
| Nicotinic acid derivatives                          | niacin                           |
| Lipid-regulating agents <sup>3</sup>                | omega-3-acid ethyl esters        |
| Combination therapies                               | atorvastatin/amlodipine          |
|                                                     | lovastatin/niacin                |
|                                                     | pravastatin/aspirin <sup>4</sup> |
|                                                     | simvastatin/ezetimibe            |
|                                                     | simvastatin/niacin               |
|                                                     | simvastatin/sitagliptin          |

<sup>1</sup>Cerivastatin was discontinued in 2001.

<sup>2</sup>Clofibrate was discontinued in 2002.

<sup>3</sup>Icosapent ethyl was approved on 26 July 2012.

<sup>4</sup>Pravastatin/aspirin was discontinued on 18 May 2005.

**Table S2. CVE codes.**

| <b>Condition</b>                  | <b>ICD-9-CM Diagnosis</b> | <b>HCPCS</b>             | <b>ICD-9-CM Procedure</b> | <b>Description</b>                                                                                                                            |
|-----------------------------------|---------------------------|--------------------------|---------------------------|-----------------------------------------------------------------------------------------------------------------------------------------------|
| MI                                | 410.xx                    |                          |                           | Acute myocardial infarction                                                                                                                   |
| Ischemic (non-hemorrhagic) stroke | 433.x1                    |                          |                           | Occlusion and stenosis of precerebral arteries, with cerebral infarction                                                                      |
|                                   | 434.x1                    |                          |                           | Occlusion of cerebral arteries, with cerebral infarction                                                                                      |
| PCI                               |                           | 92980-92981              |                           | Transcatheter placement of an intracoronary stent(s), percutaneous, with or without other therapeutic intervention, any method                |
|                                   |                           | 92982, 92984             |                           | Percutaneous transluminal coronary balloon angioplasty                                                                                        |
|                                   |                           | 92995-92996              |                           | Percutaneous transluminal coronary atherectomy, by mechanical or other method, with or without balloon angioplasty                            |
|                                   |                           | G0290-G0291              |                           | Transcatheter placement of a drug eluting intracoronary stent(s), percutaneous, with or without other therapeutic intervention                |
|                                   |                           |                          | 00.66                     | Percutaneous transluminal coronary angioplasty [PTCA]                                                                                         |
|                                   |                           |                          | 36.06                     | Insertion of non-drug-eluting coronary artery stent(s)                                                                                        |
|                                   |                           |                          | 36.07                     | Insertion of drug-eluting coronary artery stent(s)                                                                                            |
| CABG                              |                           | 33510-33514, 33516       |                           | Coronary artery bypass, vein only                                                                                                             |
|                                   |                           | 33517-33519, 33521-33523 |                           | Coronary artery bypass, using venous graft(s) and arterial graft(s)                                                                           |
|                                   |                           | 33533-33536              |                           | Coronary artery bypass, using arterial graft(s)                                                                                               |
|                                   |                           | S2205-S2209              |                           | Minimally invasive direct coronary artery bypass surgery involving mini-thoracotomy or mini-sternotomy surgery, performed under direct vision |
|                                   |                           |                          | 36.1x                     | Bypass anastomosis for heart revascularization                                                                                                |
|                                   |                           |                          | 36.2                      | Heart revascularization by arterial implant                                                                                                   |
| Unstable angina                   | 411.1                     |                          |                           | Intermediate coronary syndrome                                                                                                                |

| <b>Condition</b>                   | <b>ICD-9-<br/>CM<br/>Diagnosis</b> | <b>HCPC<br/>S</b> | <b>ICD-9-<br/>CM<br/>Procedur<br/>e</b> | <b>Description</b>                                                                                   |
|------------------------------------|------------------------------------|-------------------|-----------------------------------------|------------------------------------------------------------------------------------------------------|
|                                    | 411.8x                             |                   |                                         | Other acute and subacute forms of ischemic heart disease                                             |
| TIA                                | 435.x                              |                   |                                         | Transient cerebral ischemia                                                                          |
| HF                                 | 428.xx                             |                   |                                         | Heart failure                                                                                        |
| Post-MI condition                  | 411.0                              |                   |                                         | Postmyocardial infarction syndrome                                                                   |
|                                    | 412                                |                   |                                         | Old myocardial infarction                                                                            |
|                                    | 429.7x                             |                   |                                         | Certain sequelae of myocardial infarction, not elsewhere classified                                  |
| Hypertensive heart disease with HF | 402.x1                             |                   |                                         | Hypertensive heart disease with heart failure                                                        |
|                                    | 404.x1                             |                   |                                         | Hypertensive with heart failure and chronic kidney disease stage I through stage IV (or unspecified) |
|                                    | 404.x3                             |                   |                                         | Hypertensive with heart failure and chronic kidney disease stage V (or end stage renal disease)      |

**Table S3. Comorbid condition codes.**

| <b>Condition</b>                                                | <b>ICD-9-CM Diagnosis</b> | <b>HCPCS</b> | <b>ICD-9-CM Procedure</b> | <b>Description</b>                                                                 |
|-----------------------------------------------------------------|---------------------------|--------------|---------------------------|------------------------------------------------------------------------------------|
| Hemorrhagic stroke                                              | 430                       |              |                           | Subarachnoid hemorrhage                                                            |
|                                                                 | 431                       |              |                           | Intracerebral hemorrhage                                                           |
|                                                                 | 432.x                     |              |                           | Other and unspecified intracranial hemorrhage                                      |
| Carotid artery disease                                          | 433.10                    |              |                           | Occlusion and stenosis of carotid artery without mention of cerebral infarction    |
|                                                                 | 433.11                    |              |                           | Occlusion and stenosis of carotid artery with cerebral infarction                  |
|                                                                 | 433.21                    |              |                           | Dissection of carotid artery                                                       |
| Chronic renal failure (excluding combination with hypertension) | 585.x                     |              |                           | Chronic kidney disease (CKD)                                                       |
|                                                                 | 586                       |              |                           | Unspecified renal failure                                                          |
|                                                                 | 587                       |              |                           | Unspecified renal sclerosis                                                        |
| COPD                                                            | 491.xx                    |              |                           | Chronic bronchitis                                                                 |
|                                                                 | 492.x                     |              |                           | Emphysema                                                                          |
|                                                                 | 494.x                     |              |                           | Bronchiectasis                                                                     |
| Asthma                                                          | 493.xx                    |              |                           | Asthma                                                                             |
| Mental disorders                                                | 290.xx-299.xx             |              |                           | Psychoses                                                                          |
|                                                                 | 300.xx-316                |              |                           | Neurotic disorders, personality disorders, and other nonpsychotic mental disorders |
|                                                                 | 317-319                   |              |                           | Mental retardation                                                                 |
| Osteoarthritis                                                  | 715.xx                    |              |                           | Osteoarthritis and allied disorders                                                |
|                                                                 | 721.0                     |              |                           | Cervical spondylosis without myelopathy                                            |
|                                                                 | 721.2                     |              |                           | Thoracic spondylosis without myelopathy                                            |
|                                                                 | 721.3                     |              |                           | Lumbosacral spondylosis without myelopathy                                         |
|                                                                 | 721.90                    |              |                           | Spondylosis of unspecified site without mention of myelopathy                      |
