# Supplementary material for: A Retrospective Study to Examine Healthcare Costs Related to Cardiovascular Events in Individuals with Hyperlipidemia
Source: PubMed Central journal article supplement — Adv Ther. 2015 Nov 19;32(11):1104–16. doi: 10.1007/s12325-015-0264-7 (PMC4662727; doi:10.1007/s12325-015-0264-7), 2015-11-19
Supplement: 12325_2015_264_MOESM2_ESM.pdf [file 12325_2015_264_MOESM2_ESM.pdf]

- The primary objective of this study was to determine the mean costs associated with cardiovascular events (CVEs) among patients with hyperlipidemia by follow-up time period; secondary objectives of this study included characterizing costs by CVE type and coronary heart disease (CHD) risk.
- This retrospective cohort study including 193,385 patients used longitudinal claims to calculate payer costs (both health plan-paid and patient-paid amounts) during several follow-up periods (acute [30-day] and short-term, comprising year 1; plus years 2 and 3).
- Costs in the acute period were highest (\$22,404) driven by inpatient care (77%). Costs remained high over time (\$15,133 in year 3), with ambulatory care (from 14% in acute to 37% in year 3) and pharmaceutical costs (from 2% in acute to 24% in year 3) representing a greater proportion.
- Acute costs varied considerably by type of CVE, but post-acute costs were more similar across types. Costs differed by baseline CHD risk for all follow-up periods, but less than by CVE type.
- Among patients with hyperlipidemia, the economic burden of CVEs is substantial up to 3 years after a CVE, remains high after subsequent CVEs, and actually increases for non-inpatient utilization.

This summary slide represents the opinions of the authors. Sponsorship for this study was funded by Amgen Inc. Medical writing assistance for this study was provided by Caroline Jennermann (Optum, Inc.). For a full list of acknowledgments and disclosures for all authors of this article, please see the full text online. © The Author(s) 2015. Creative Commons Attribution Noncommercial License (CC BY-NC).
